# Supplementary material
Source: PubMed Central journal article supplement (PMC5277509)
Supplement: JCM.01858-16_zjm999095337s1.pdf [file JCM.01858-16_zjm999095337s1.pdf]

FIG 1 Receiver operating characteristics (ROC) curves were made for the performances of the individual tests. For GDH ELFA, *artus* PCR and in-house PCR, the diagnostic accuracy as given by the area under the curve was 0.8918, 0.9467 and 0.9314, respectively.

# ROC Curve for Vidas GDH ELFA

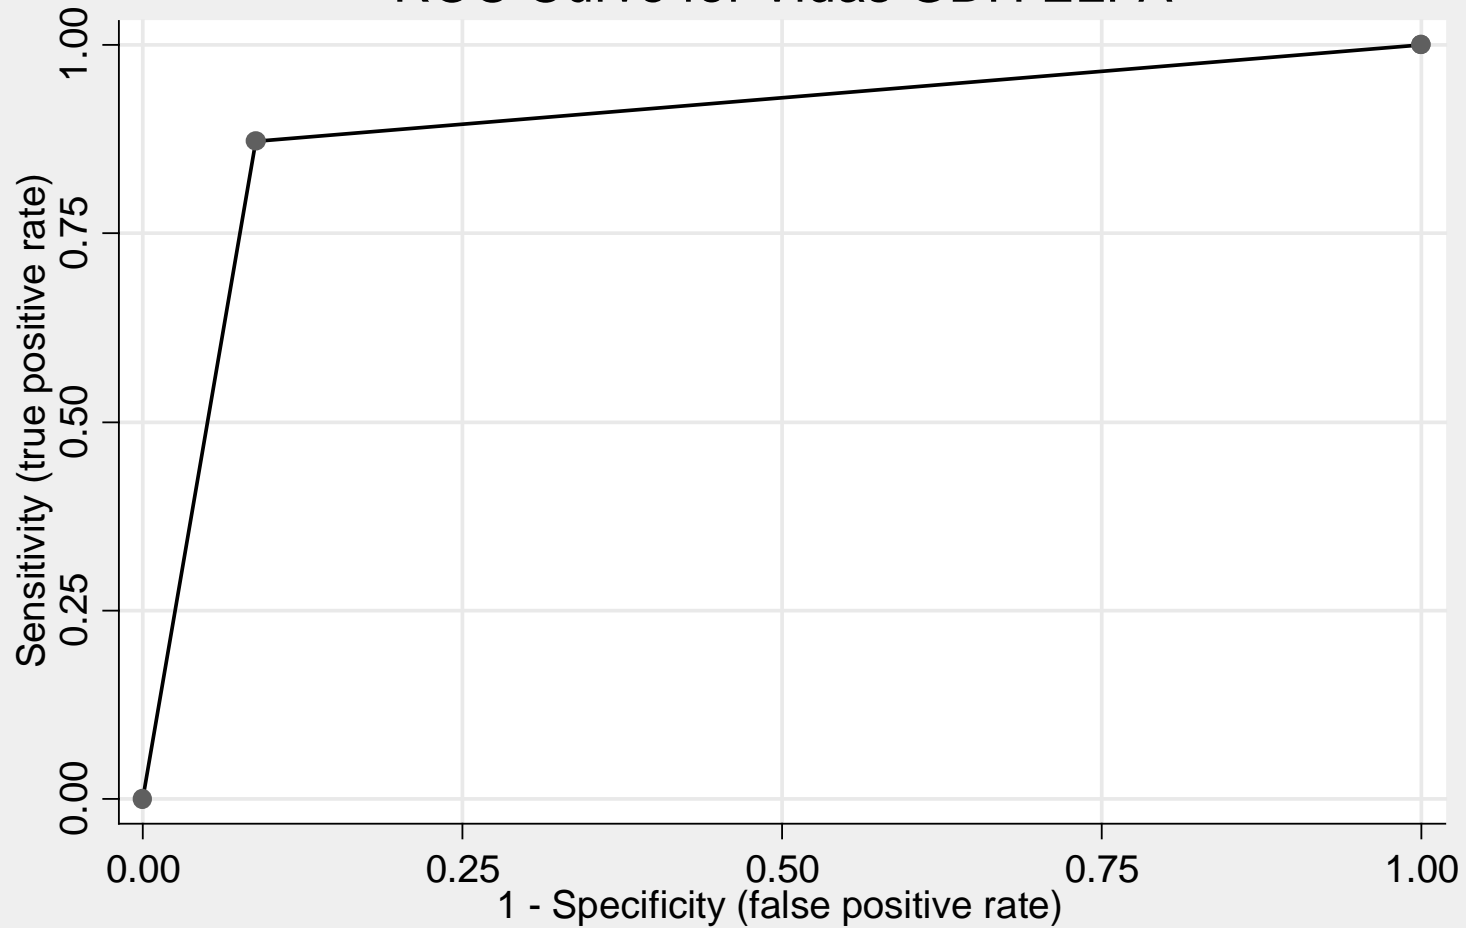

Area under ROC curve = 0.8918

# ROC Curve for artus PCR

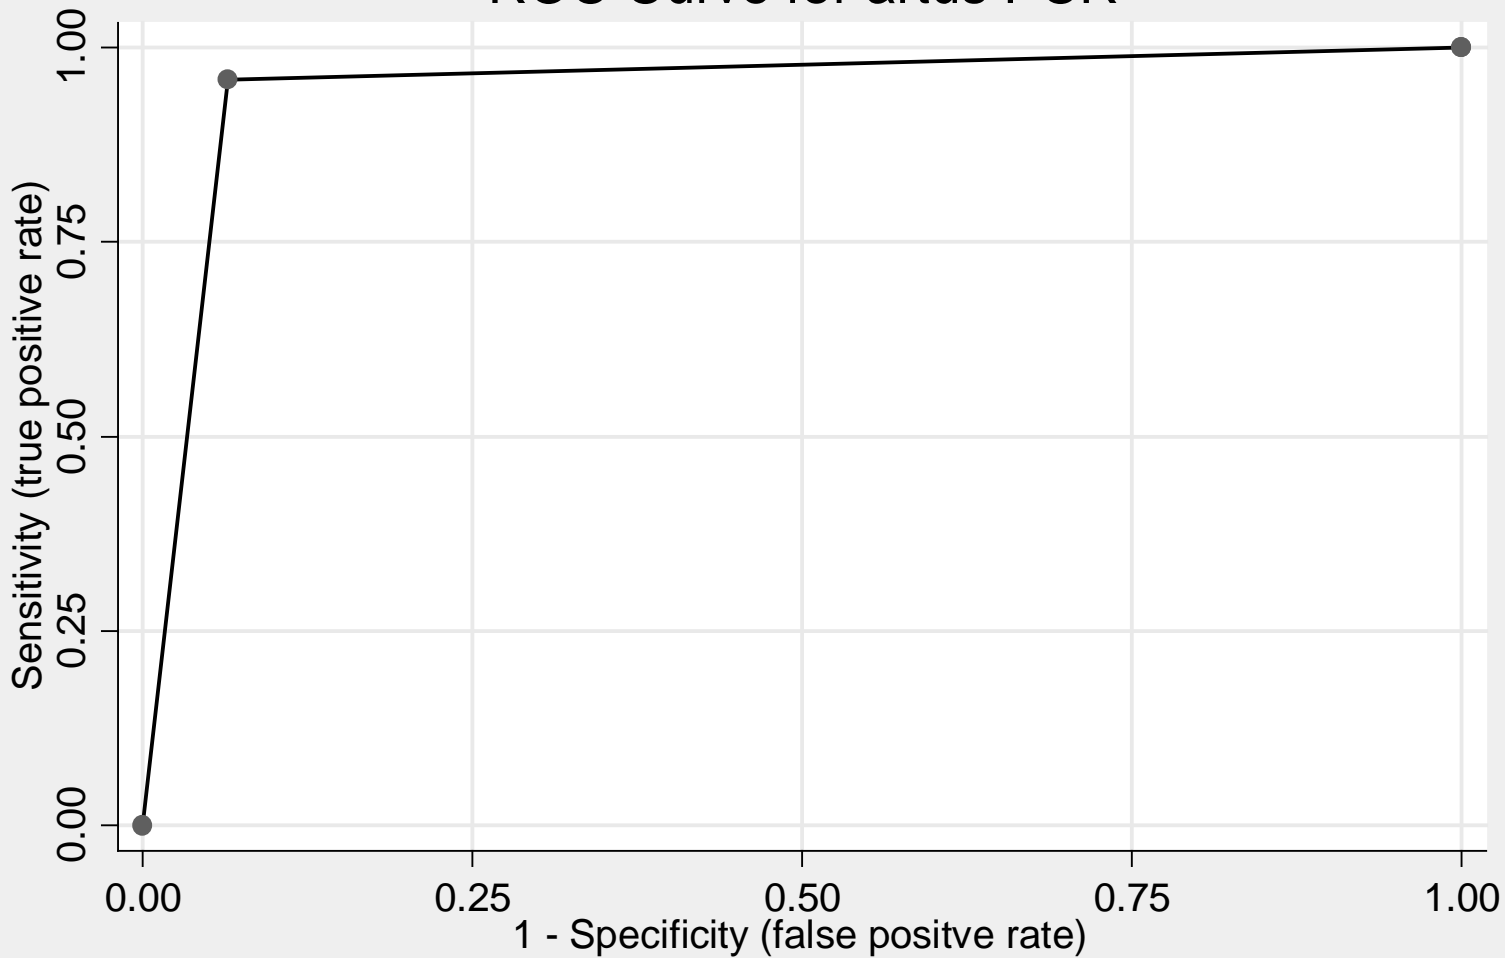

Area under ROC curve = 0.9467

# ROC Curve for in-house PCR

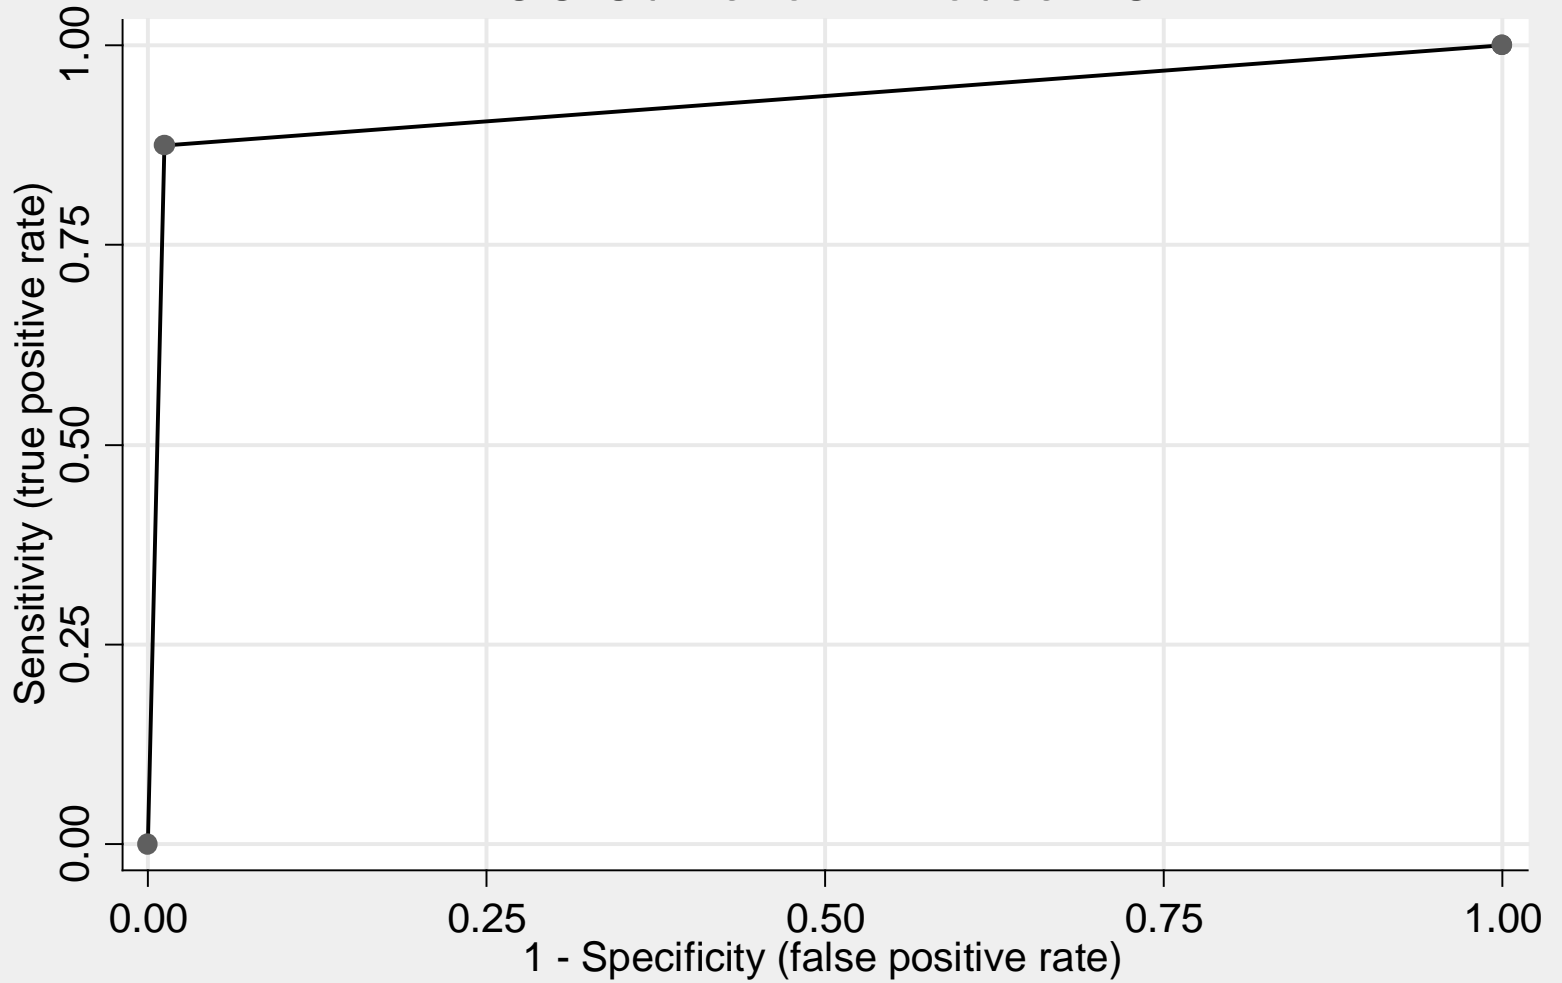

Area under ROC curve = 0.9314
